# Supplementary material for: Wnt7a stimulates myogenic stem cell motility and engraftment resulting in improved muscle strength
Source: PubMed Central journal article supplement — J Cell Biol. 2014 Apr 14;205(1):97–111. doi: 10.1083/jcb.201310035 (PMC3987134; doi:10.1083/jcb.201310035), 2014-04-14
Supplement: supp_jcb.201310035_JCB_201310035_sm.pdf [file supp_jcb.201310035_JCB_201310035_sm.pdf]

Bentzinger et al., <http://www.jcb.org/cgi/content/full/jcb.201310035/DC1>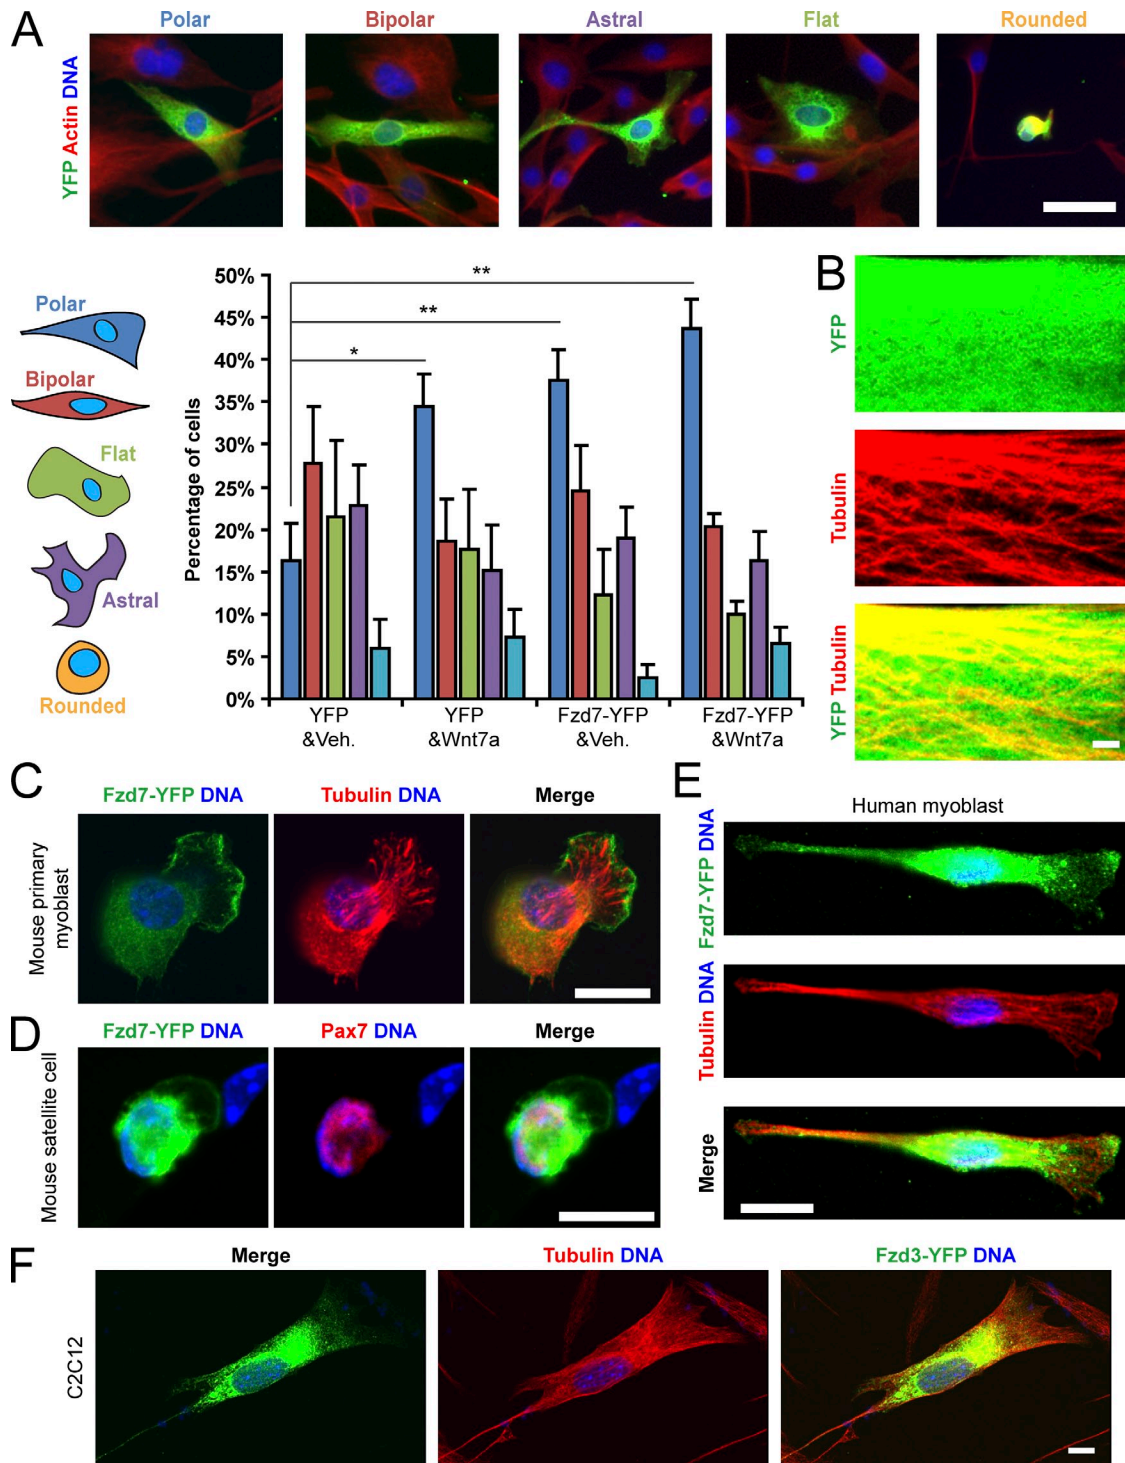

Figure S1. **Wnt7a and Fzd7 polarize myogenic cells.** (A) Morphological quantification of C2C12 cells transfected with the indicated constructs and treated with either Wnt7a or vehicle. Representative pictures of morphologies are depicted with YFP-transfected cells above. Bars represent means  $\pm$  SEM;  $n \geq 4$ . \*\* ,  $P < 0.01$ ; \* ,  $P < 0.05$ . (B) Subcellular localization of YFP with respect to the tubulin cytoskeleton. Bar, 2  $\mu$ m. (C) Localization of Fzd7-YFP in primary myoblasts. Note the accumulation of Fzd7 in the cellular periphery. Bar, 10  $\mu$ m. (D) Localization of Fzd7-YFP in satellite cells that were transfected on single muscle fibers. Accumulation of Fzd7 in the cellular periphery can be observed. Bar, 10  $\mu$ m. (E) A human primary myoblast that was transfected with Fzd7-YFP. Similar to other myogenic cell types, Fzd7 shows accumulation in the periphery of the cell. Bar, 10  $\mu$ m. (F) Little to no peripheral localization could be observed for Fzd3-YFP in C2C12 cells. Bar, 10  $\mu$ m.

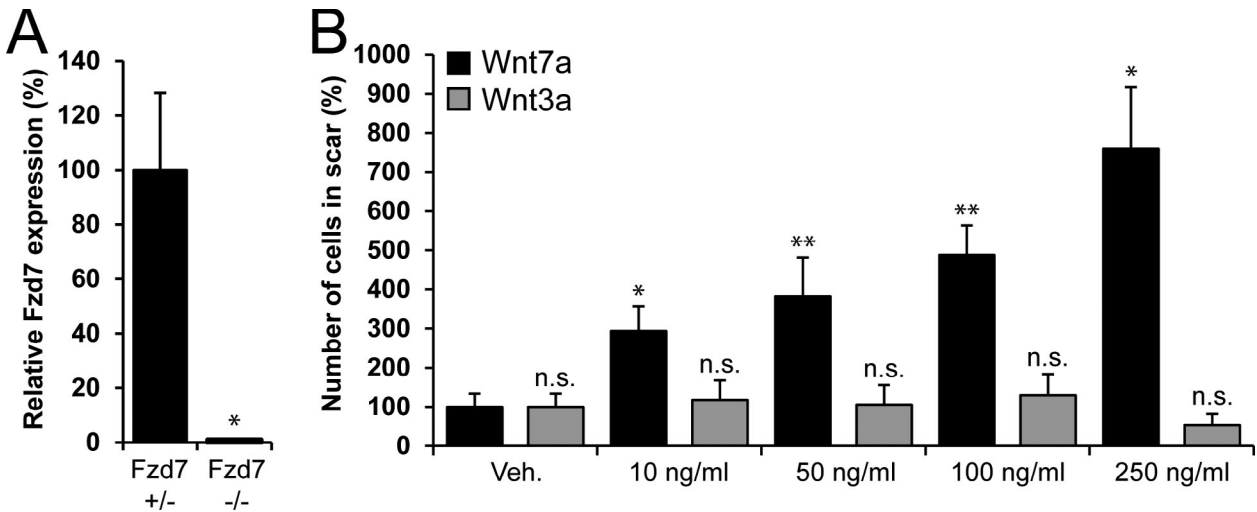

Figure S2. **Fzd7 mRNA levels in Fzd7 knockout muscle tissue and dose dependency of Wnt7a-mediated cell migration.** (A) qPCR comparing Fzd7 expression in muscles of Fzd7<sup>+/-</sup> and Fzd7<sup>-/-</sup> mice. Bars represent means  $\pm$  SEM;  $n = 3$ . \*,  $P < 0.05$ . (B) Scratch assay using mouse primary myoblasts that were exposed to different concentrations of Wnt3a or Wnt7a. Bars represent means  $\pm$  SEM;  $n = 3$ . \*,  $P < 0.05$ ; \*\*,  $P < 0.01$ . n.s., no significant difference.

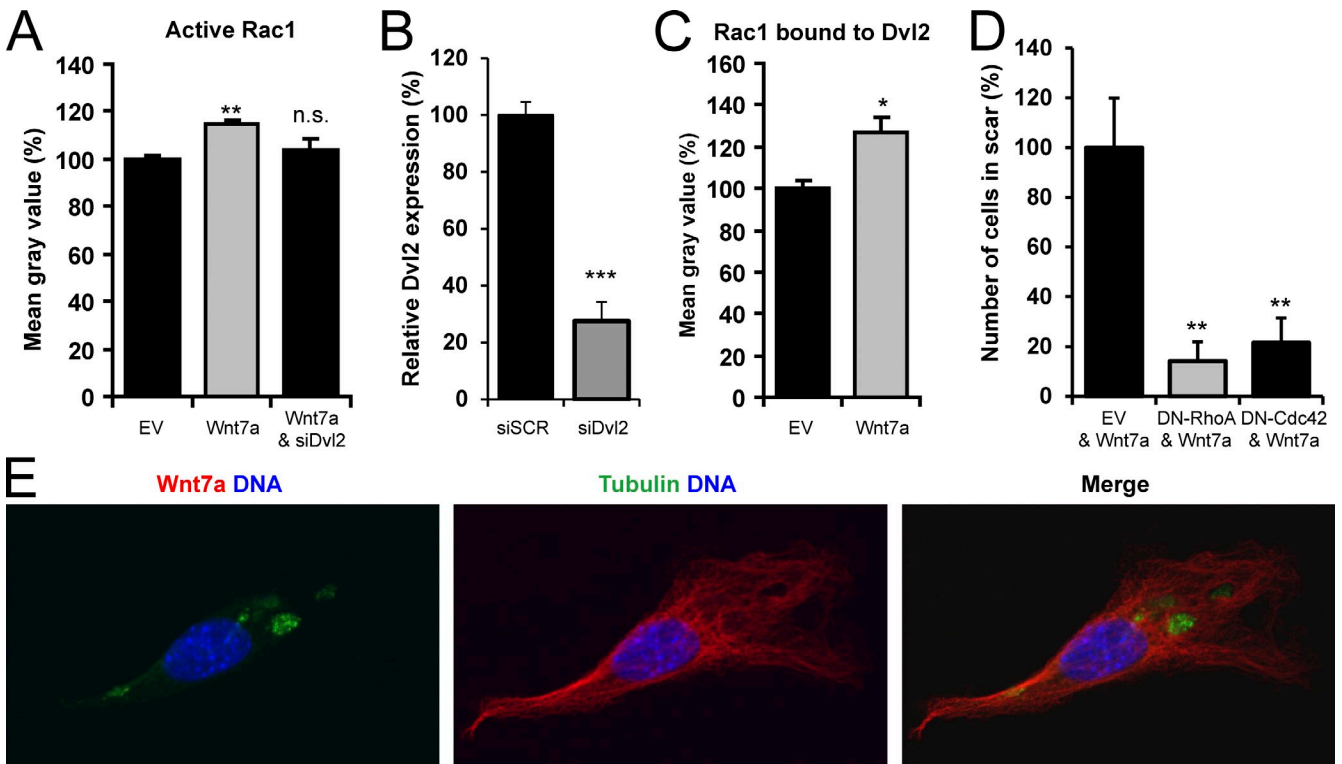

Figure S3. **Gray value quantification of Western blots, Dvl2 knockdown, and Wnt7a endocytosis in C2C12 cells.** (A) Gray value quantification of Western blots for active Rac1 as shown in Fig. 3 B. Bars represent means  $\pm$  SEM;  $n = 3$ . \*\*,  $P < 0.01$ . n.s., no significant difference. (B) qPCR comparing Dvl2 expression upon siDvl2 or siSCR treatment in primary myoblasts. Bars represent means  $\pm$  SEM;  $n = 3$ . \*\*\*,  $P < 0.001$ . (C) Gray value quantification from Western blots of Rac1 bound to Dvl2 as shown in Fig. 3 C. Bars represent means  $\pm$  SEM;  $n = 5$ . \*,  $P < 0.05$ . (D) Scratch assay using Wnt7a-stimulated mouse primary myoblasts expressing either EV, RhoA-DN, or Cdc42-DN. Bars represent means  $\pm$  SEM;  $n = 3$ . \*\*,  $P < 0.01$ . (E) A C2C12 cell that was loaded for 3 h with Wnt7a-HA from conditioned medium produced in COS-1 cells, washed extensively, and then cultured for  $>72$  h. Wnt7a was detected by staining for the HA epitope. Bar, 10  $\mu$ m.

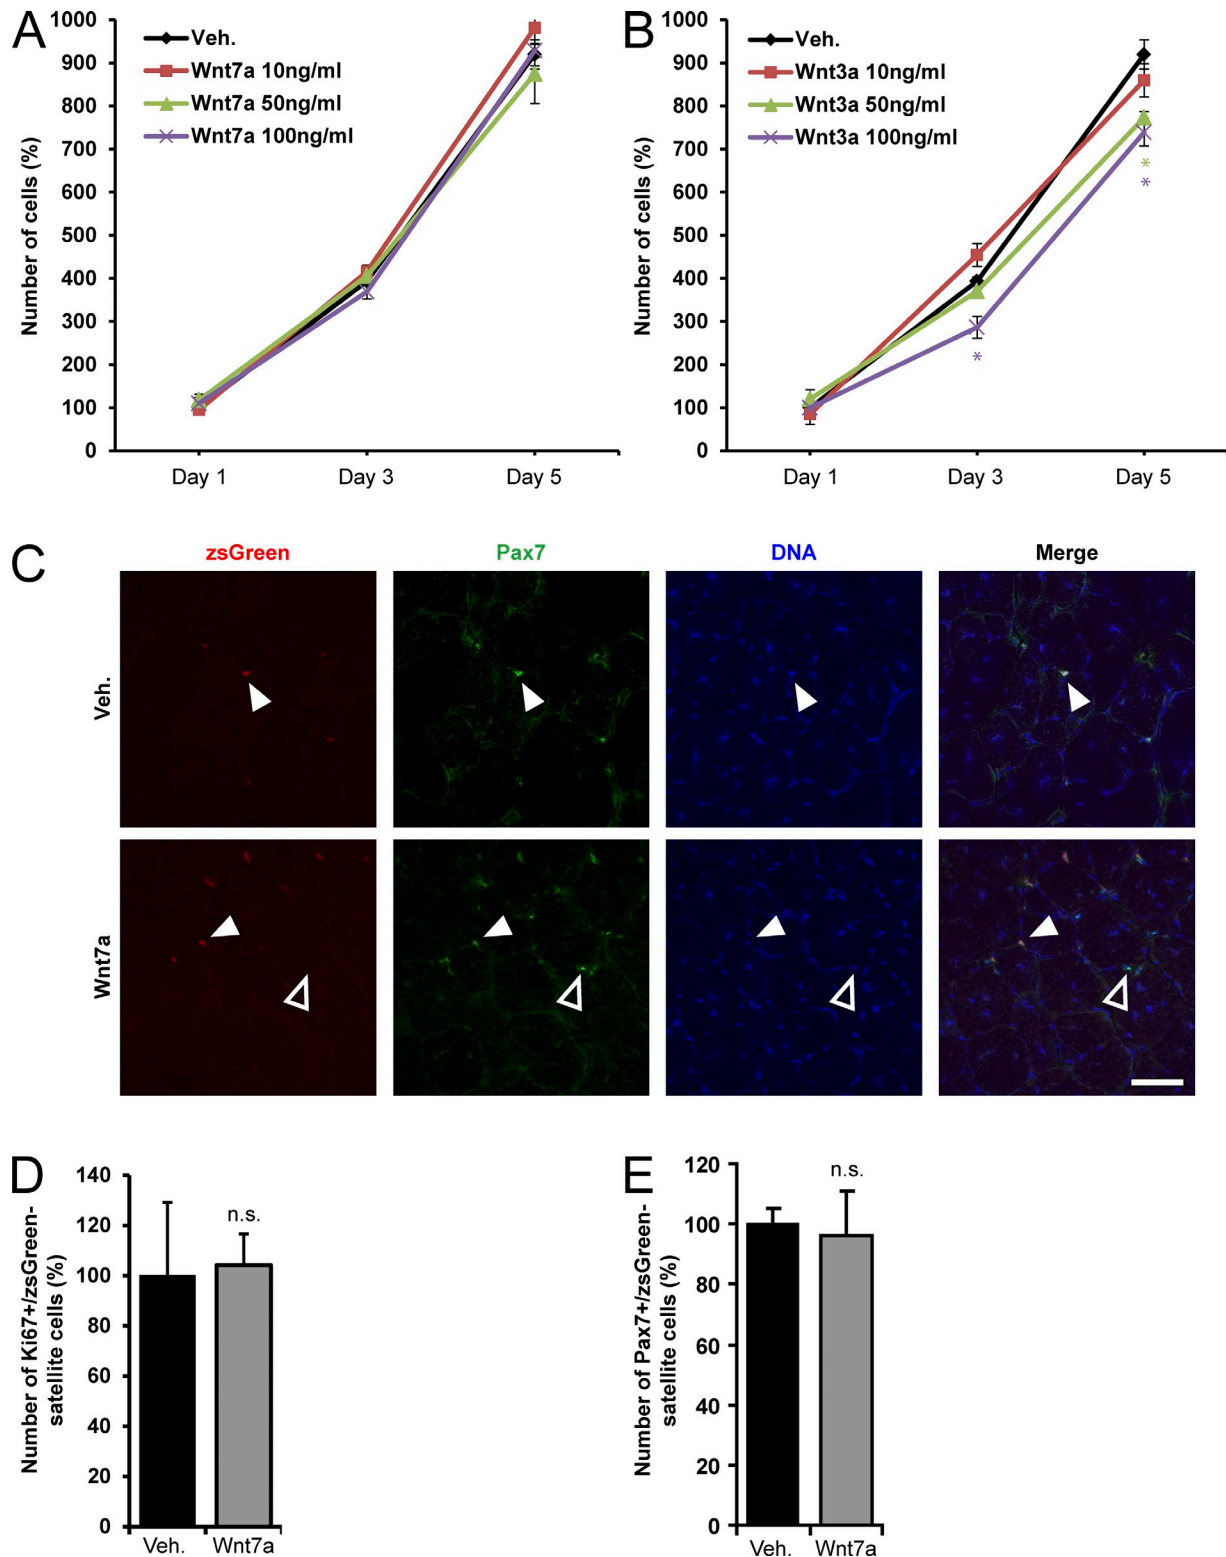

Figure S4. **Wnt7a loading does not influence the cell cycle, increases engraftment, and does not alter the number of endogenous satellite cells.** (A and B) The proliferation of equal numbers of primary myoblasts in the presence of different concentrations of Wnt7a and Wnt3a was assayed over five days. Data points represent means  $\pm$  SEM;  $n = 3$ . \*,  $P < 0.05$ . (C) Immunostaining for engrafted zsGreen-positive satellite cells (full arrowheads) upon Wnt7a and vehicle treatment. Host-derived satellite cells are negative for zsGreen (empty arrowhead). Bar, 50  $\mu$ m. (D) Pax7<sup>+</sup>/zsGreen<sup>+</sup> engrafted satellite cells that were treated with Wnt7a do not show more Ki67 staining than vehicle-treated cells. Bars represent means  $\pm$  SEM;  $n = 3$ . (E) The number of endogenous Pax7<sup>+</sup>/zsGreen<sup>-</sup> satellite cells is not significantly changed by transplantation of Wnt7a or vehicle-treated satellite cells. Bars represent means  $\pm$  SEM;  $n = 3$ . n.s., no significant difference.

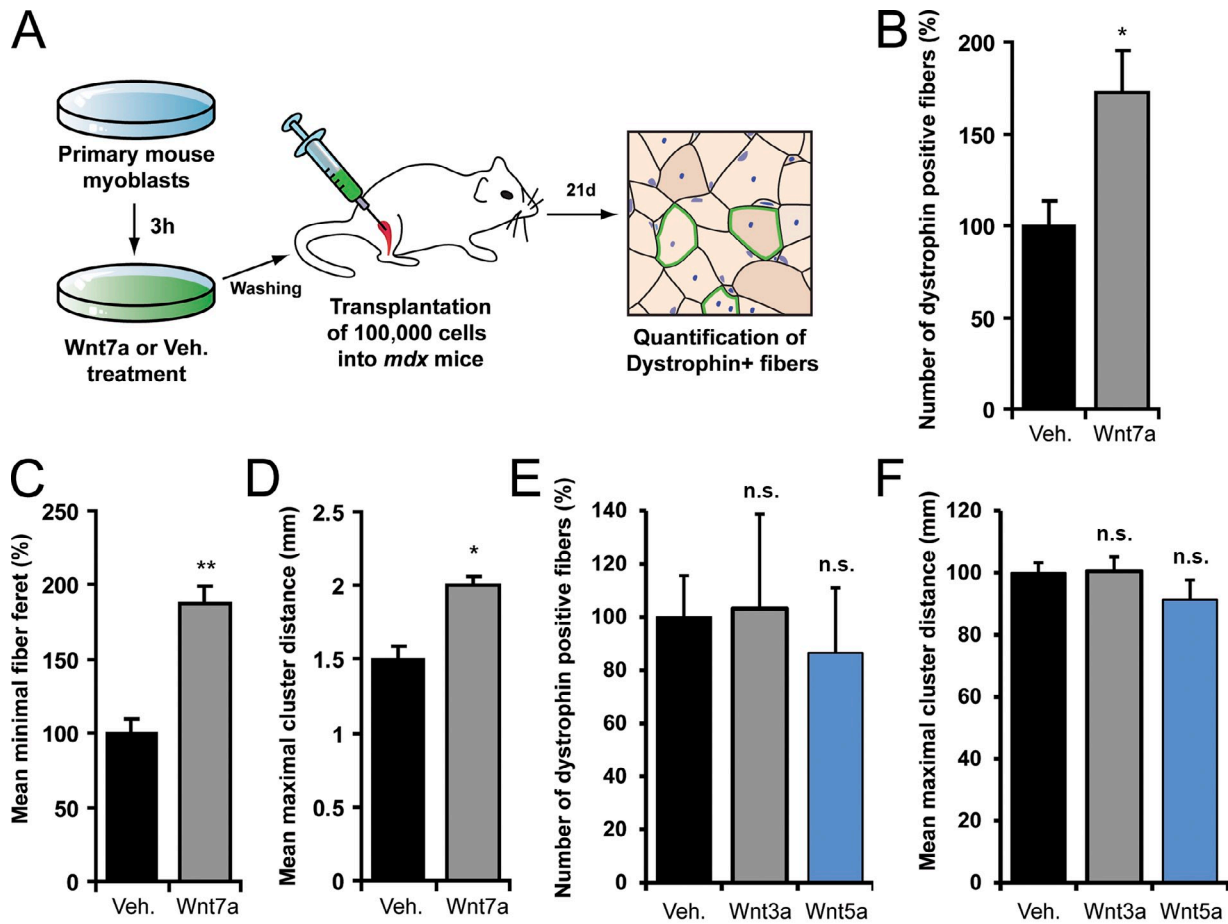

Figure S5. **Wnt7a loading improves the engraftment of mouse primary myoblasts.** (A) Strategy used for Wnt7a or vehicle treatment and subsequent transplantation of mouse primary myoblasts into *mdx* mice. (B) Number of dystrophin-positive fibers upon transplantation of Wnt7a or vehicle-treated mouse primary myoblasts. Bars represent means  $\pm$  SEM;  $n = 3$ . \*,  $P < 0.05$ . (C) Minimal fiber feret of dystrophin-positive fibers generated from fusion with Wnt7a or vehicle-treated mouse primary myoblasts. Bars represent means  $\pm$  SEM;  $n = 3$ . \*\*,  $P < 0.01$ . (D) Mean maximum cluster distance in muscles transplanted with Wnt7a or vehicle-treated mouse primary myoblasts. Bars represent means  $\pm$  SEM;  $n = 3$ . \*,  $P < 0.05$ . (E and F) Three weeks after transplantation of Wnt3a and Wnt5a-treated zsGreen<sup>+</sup> myoblasts, no difference in the number of dystrophin-positive fibers or in the mean maximal cluster distance is observed when compared with vehicle. Bars represent means  $\pm$  SEM;  $n = 3$ . n.s., no significant difference.

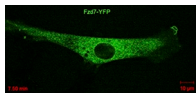

Video 1. **Localization of Fzd7-YFP in migrating C2C12 cells.** C2C12 cells were transfected with Fzd7-YFP. Images were analyzed by time-lapse confocal microscopy using a laser-scanning confocal microscope (LSM710; Carl Zeiss). Frames were taken every 15 s for 29.5 min.

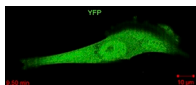

Video 2. **Localization of YFP in migrating C2C12 cells.** C2C12 cells were transfected with YFP. Images were analyzed by time-lapse confocal microscopy using a laser-scanning confocal microscope (LSM710; Carl Zeiss). Frames were taken every 15 s for 14.75 min.

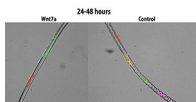

Video 3. **Effect of Wnt7a on satellite cell migration.** Satellite cell time-lapse microscopy was performed using an inverted microscope (DMI 5100; Leica) and MetaMorph 7.6.1 software (Molecular Devices) with time points being acquired every 7 min in a stage-top incubator (LiveCell Imaging) for 24 h.
